1 Eusociality and other improbable evolutionary outcomes can  
2 be accelerated by trait hitchhiking in boom-bust feedback  
3 loops

4

5 WILLIAM H. CALVIN

6 Department of Psychiatry and Behavioral Sciences, University of Washington,  
7 725 9th Avenue, Box 2605, Seattle WA 98104-2086, WCalvin@UW.edu, and the  
8 UCSD/Salk Center for Academic Research and Training in Anthropogeny, La Jolla CA 92037

9

10 Here I analyze the brush-fire cycle behind the brushy frontier of a grassland, seeking  
11 evolutionary feedback loops for large grazing animals and their hominin predators.  
12 The burn scar's new grass is an empty niche for grass-specialized herbivores, which  
13 evolved from mixed feeders only in the early Pleistocene. The frontier  
14 subpopulation of grazers that discovers the auxiliary grassland quickly multiplies,  
15 creating a secondary boom among predators. Following this boom, a bust occurs  
16 several decades later when the brush returns; it squeezes both offshoot  
17 populations back into their core grasslands population. For both prey and  
18 predators, such a feedback loop can shift the core's gene frequencies toward those  
19 of the brush explorers. Any brush-relevant allele could benefit from this amplifying  
20 feedback loop, so long as its phenotypes concentrate near where empty niches can  
21 open up in the brush; with hitchhiking, improved survival is unnecessary.  
22 Cooperative nurseries in the brush's shade should concentrate the alleles favoring  
23 eusociality, enabling their amplification.

24

25 It is important to analyze evolution's fast tracks because they can  
26 occasionally pre-empt the more familiar slow tracks. The traditional  
27 Darwinian approach looks to some immediate usefulness that allows  
28 differential survival to slowly operate on current variations in a trait.

29 Here I am instead looking for a self-sustaining process in the  
30 habitat, then asking if it could affect a trait in the manner that a  
31 catalyst increases chemical reaction rates. A desirable feature of such  
32 a process would be amplifying feedback, where some fraction or

1 function of the output feeds back to become part of the input during  
2 the next time step, as in the compounding of interest.

3 I earlier illustrated (1) how feedback could operate on a broad front  
4 during an ice-age cycle. A more useful case to analyze is the boom and  
5 bust that follows a brush fire; they recur far more often than climate  
6 change. In a month, the burn scar becomes an auxiliary grassland  
7 (Fig. 1) supporting a population boom for large grazing animals and  
8 their dependent predators such as *Homo erectus*. The bust comes  
9 decades later when returning brush squeezes the boom time  
10 population out of the burn scar; then, many end up in the parent  
11 population, the setup for feedback. Here I explore the boom-and-  
12 feedback process and show how it can enable trait hitchhiking in  
13 evolution.

14 This analysis of the brush-fire feedback loop demonstrates an  
15 exception to the usual way an adaptation is shaped by natural  
16 selection. Boom-and-bust feedback loops can allow an unrelated trait  
17 to repeatedly hitchhike; it need not be useful to be repeatedly  
18 amplified. It was only when grazer booms began 2.4 mya (2) that  
19 hitchhiking became available to amplify *Homo* traits such as  
20 eusociality and behavioral versatility.

21 Fig. 1. Antelope and the new grass in Kruger National Park, two months after a brush fire. Credit: Navashni  
22 Govender, fire ecology manager, South African National Parks.

23 Fig. 2. The grazers' brush-fire version of the selective boom time feedback loop. Cautious grazers from the  
24 frontier (many of the bold were eaten earlier) discover the burn scar and experience a population boom. Later,  
25 their mostly *cautious* descendants are squeezed out as the brush returns, making the core and its frontier more  
26 *cautious*.

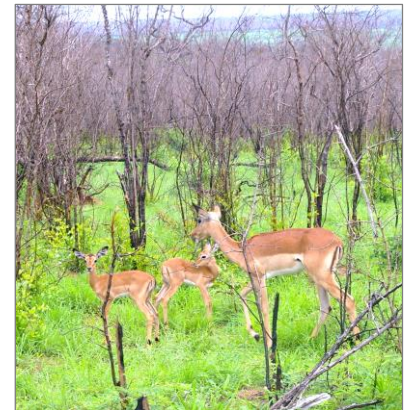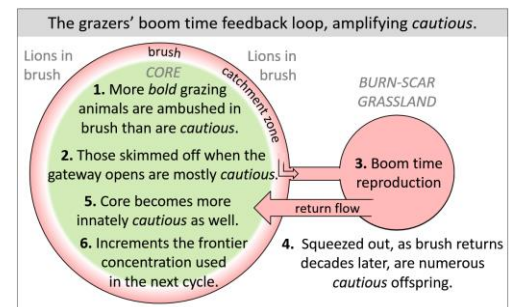

## 27 Conditions for the boom in the feedback loop

28 The mile-high savannas of East Africa and South Africa have a  
29 particularly high rate of lightning strikes. Many brush fires result and,  
30 in the dry season, a large area can burn. Soon, grass sprouts (Fig. 1).  
31 If the burn scar has a path connecting to inhabited grassland, grazing  
32 animals from the brush frontier subpopulation will move in, followed  
33 by their predators.

1 This offshoot grazer population quickly doubles and re-doubles to  
2 fill the empty niche, all based on the grazer genes at the brush  
3 frontier. They may differ from those of the core population, making  
4 gene flow non-random (3).

5 To illustrate, consider the heritable cautious-to-bold spectrum for  
6 exploratory behaviors. In the period before a lightning strike, the  
7 lions and leopards hiding in the brush would preferentially reduce the  
8 frontier numbers of the bold grazers, and so the innately cautious ones  
9 would get more of the population boom when the corridor to the  
10 empty niche (Fig. 2.2) suddenly opens up via one of the “dead end”  
11 paths.

12 In subsequent decades, as returning brush gradually replaces the  
13 temporary grass, their offspring are squeezed out of the burn scar  
14 (Fig. 2.4). If they join the parent population, they make both its  
15 grasslands core and brush frontier (Fig. 2.6) more innately cautious.

16 The cycle repeats because lightning strikes keep iterating the loop.  
17 Lightning may also cause grass fires but grasses recover so quickly  
18 that grazing resources are little affected. The leaf-eating browser  
19 populations may be somewhat reduced by a brush fire; populations of  
20 mixed-feeders such as modern elephant and impala need not  
21 experience a decades-long change in overall food resources.

22 Thus there is no boom-time population with a feedback loop except  
23 for brush fires near grasslands inhabited by grass-specialized  
24 herbivores—and their predators. Minor climate fluctuations can  
25 enhance the amplification process: droughts beforehand or stronger  
26 winds make for a larger burn scar, a bigger population boom, and thus  
27 more return flow into the core decades later.

## 28 Quickly shifting gene frequencies

29 Most genes come in only one fixed version but some have slightly  
30 different versions called alleles, produced earlier by mutations. The

1 allele varieties in play help generate, for example, the 15% spread in  
2 human brain size within a generation.

3 Gene frequency refers to the relative proportion of alleles in the  
4 gene's population. Here, *concentrating* an allele refers to making it  
5 relatively more common in the catchment zone and *amplification* to  
6 the entire process that increases an allele's numbers in the core, thus  
7 shifting the allele proportion there. Altering allele proportions, often  
8 in multiple genes, is the route to an adaptation, such as making the  
9 population more innately cautious.

10 Even without feedback, differential survival shifts the frontier gene  
11 frequencies, relative to the core, but mixing is slow to shift the core  
12 when, say, the frontier subpopulation is only 5% of the total.  
13 However, feedback's consolidation of a nonstandard offshoot  
14 population back into a parent population quickly shifts its gene  
15 frequencies in the manner of Sewall Wright's shifting balance theory  
16 (4).

17 The sequence repeats with the next lightning strike, perhaps  
18 somewhere else along the brushy border. How many complete  
19 episodes does it take to triple the core's numbers of a frontier-relevant  
20 allele?

21 Only five (Fig. 3). Were the contrasts between core and frontier not  
22 so exaggerated, it might be 50 repeats instead but that is still a short  
23 time by the continuous-mixing standard.

24 Selective survival on the frontier may provide the skewed setup, but  
25 the rapid tripling comes from filling the empty niche with the  
26 frontier's gene frequencies and the later consolidation of this biased  
27 offshoot population into the larger parent population to create  
28 feedback.

29 Amplifying *cautious* is but one example of a trait that can be  
30 enhanced by this feedback mechanism.

1 Fig. 3. Core population gene frequencies, before and after five boom-and-  
2 bust feedback episodes using a burn scar that is one-fourth the size of the  
3 core grassland (here I fix the frontier at 80% *cautious* to emphasize the larger  
4 effect of sheer numbers). After the squeeze by returning brush, the core  
5 becomes 32% *cautious*, then 41%, 49%, 55%, and 60%. Tripling in five  
6 episodes depends on the core starting at 20% *cautious*. If it starts at 50%, the  
7 five episodes advance the core from 50% to 71% *cautious*. Such a simple model using  
8 relative population sizes is possible because the desideratum, gene frequency, is itself a ratio,  
9 because an overfull core is handled by carrying capacity in an unchanged way, and because I  
10 assume no selective survival changes during amplification.

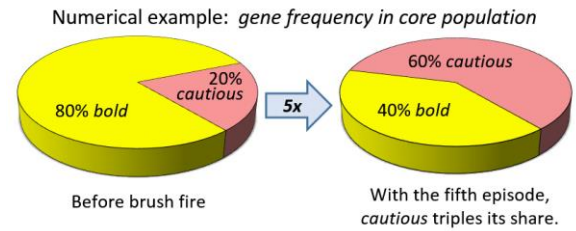

11

## 12 The Darwinian process and state-dependent 13 fecundity

14 For the gradual quality improvement that we associate with natural  
15 selection, I earlier identified six essential conditions for a full-fledged  
16 Darwinian process, which I formulated in more general terms to cover  
17 non-genetic examples such as competing cerebral codes (5,6,7):

- 18 1. There must be a pattern involved (such as the ordering of a DNA  
19 string) that stores the heritable information;
- 20 2. The pattern must be copied somehow; indeed, that which is semi-  
21 reliably copied may help to define the pattern, as in genes. This  
22 copying requirement is likely to restrict patterns to one-dimensional  
23 ones.
- 24 3. Variant patterns must arise occasionally (alleles from mutations and  
25 copying errors).
- 26 4. The pattern and its variant must compete with one another for  
27 occupation of a limited work space (much as bluegrass and crabgrass  
28 compete for space in a back yard).
- 29 5. The copying competition between variants is biased by a multifaceted  
30 environment (for grass: soil moisture, rate of cropping by grazers,  
31 nutrient availability). This condition is Darwin's natural selection.
- 32 6. A variant pattern is more likely to arise from the more successful of  
33 the current patterns, simply because the successful are more  
34 numerous as a target for mutation-making. This is Darwin's

1 inheritance principle, promoting continuing improvement in the  
2 trait's fit to the phenotype's environment.

3

4 Boom-and-bust feedback loops seem not to require modification of  
5 these "six essentials." This is because natural selection operates both  
6 by selective survival (mostly via deaths of the immature) and by  
7 changes in fecundity (as when double ovulation creates dizygotic twins  
8 when food quality improves). While no change in live births per  
9 mother is postulated here, the temporary boom time allows more  
10 surplus-to-requirements infants to grow up to reproduce themselves.

11 Boom-time amplification is consistent with a generation-skipping  
12 definition of fecundity. Counting *grandchildren per grandmother*  
13 rather than *children per mother* can allow for environmental  
14 influences that are state-dependent, such as a boom time that  
15 temporarily reduces immature mortality. Fecundity already  
16 encompasses environmental influences, as when some drinking-water  
17 sources promote a high rate of spontaneous abortion: sometimes  
18 more than half drop out (8) before the heartbeat begins six weeks  
19 after conception in humans; there is a 10-15% "miscarriage" rate  
20 thereafter.

## 21 Evolutionary hitchhiking through a feedback loop

22 The basic components of the burn scar feedback loop are

- 23 • a prey species that can experience a boom in the empty niche because of  
24 unused resources,
- 25 • a catchment area for wicking off into this empty niche,
- 26 • an allele concentration mechanism (natural selection or hitchhiker  
27 concentration) in the catchment, and
- 28 • a migration path from the boom territory back to the core population  
29 during the bust phase.

30

31 For the prey species, what concentrates in the catchment area  
32 might be *cautious* or a habitat preference. Or nothing. But unless the

1 prey can experience a boom time in the empty niche (which leaves out  
2 browsers and mixed-feeders), there is little shift in the core's allele  
3 ratios for either prey or their predators.

4 However, unlike Fig. 3 with its fixed 80:20 allele ratio in the  
5 catchment, an increment in the core usually means some increase in  
6 the catchment zone, the traditional setup for an exponential rise. I  
7 have de-emphasized it here to better illuminate those aspects of  
8 amplifying feedback that require both a concentrating mechanism and  
9 a boom.

10 Hitchhiking traits in the predator species depend on all of the  
11 above but their concentration mechanism may go beyond selective  
12 survival in the catchment to include traits such as food preference and  
13 shade-seeking. Hitchhiking alleles prosper not by their own  
14 usefulness but because their phenotype got a free ride to a boom by  
15 hanging out in the burn scar's catchment zone.

16 It would be a mistake to view this boom-time feedback process as  
17 simply amplifying the effects of antecedent selective survival. In  
18 considering how the ragged brush border could have affected one of  
19 the predators of grazing animals, *Homo erectus*, I will use examples  
20 that do not involve differential survival, yet produce the same  
21 amplification via fecundity and survivorship (9).

22 In the example from grazing animals, selective survival was what  
23 made the peripheral population in the brush different from the core in  
24 the grassland. Yet if the affected individuals simply tended to have  
25 longer dwell times in the catchment zone for amplification, it will  
26 suffice. Around the loop, there need not be a filter via selective  
27 survival, which is merely one way that relevant alleles can be  
28 concentrated in the catchment zone.

29 Most obviously, the brush fire loop should amplify frontier habitat  
30 preference in the core population (Fig. 3.5). But it also amplifies any  
31 trait that co-locates in the brush, provided it has a concentration  
32 gradient between the core and the catchment.



## 1 Eusociality and the opportunity zones for allele 2 amplification

3 Eusociality, where some individuals reduce their own lifetime  
4 reproductive potential to raise the offspring of others, underlies the  
5 most elaborate forms of social organization. Breast feeding someone  
6 else's infant serves to suppress ovulation, depressing fertility for the  
7 wet nurse. Eusociality is rarely seen in evolutionary lineages (N=19),  
8 with an odd distribution through the Animal Kingdom (10); there are  
9 only two examples among mammals and one is the *Homo* lineage.

10 Might eusocial alleles concentrate in the brush and be amplified in  
11 the core by the boom-and-return loop for grazing animals' predators?  
12 In addition to the tendency of many animals to stay out of the midday  
13 sun, the bodies of human infants and children demand protection  
14 from heat stroke because they have a lot of surface area for their  
15 volume. They can quickly overheat on hot days when they are not  
16 being held against a large heat sink having additional area for  
17 evaporative cooling. In cooperative nurseries, infants may outnumber  
18 wet nurses and cannot all be held simultaneously, making shade more  
19 necessary for infant survival. The shade serves to concentrate eusocial  
20 genes in the catchment zone for the burn scar's population boom for  
21 the predator species.

22 The repeated booms could keep shifting the overall population  
23 toward eusociality, even without selective survival judging its  
24 usefulness. Recall that the frontier's selective survival is slow to alter  
25 the genetic makeup of the core by continuous mixing because of the  
26 numerical disproportion. The feedback loop inverts this, spreading  
27 brush frontier genes and culture into the core based merely on who  
28 was in the right place (the catchment zone) at the right time (when the  
29 empty niche opened up). Many catchment-zone alleles, not merely  
30 my examples, could be amplified if a concentration gradient is  
31 maintained between core and the catchment zone.



## 1 A similar loop for amplifying antibiotic resistance

2 One can see the feedback loop components more generally in this  
3 hypothetical example of a loop through a bed-sore abscess serving to  
4 accelerate the development of antibiotic resistance in the systemic  
5 circulation:

- 6 • a central population of a gene that mixes (e.g., a pathogen in the  
7 bloodstream; most variants are sensitive to antibiotics, some are  
8 resistant);
- 9 • a selective mortality (the sluggish arterial circulation to an abscess  
10 allows more time for antibodies and antibiotics to act on susceptible  
11 pathogens, thus concentrating resistant variants before arriving at the  
12 abscess);
- 13 • a population boom for this biased population in early stages of the  
14 abscess; if it repeats daily, even a small boom may suffice;
- 15 • feedback from leakage of the abscess population back into the core (the  
16 venous circulation from the abscess unkinks when a bed sore is  
17 repositioned or a hot compress is applied, releasing some of the biased  
18 boom-time population into the general circulation, increasing antibiotic  
19 resistance there, along with whatever escaped antibodies);
- 20 • repeat when the vein kinks again, pumping up the resistant pathogens  
21 in circulation.

## 22 Discussion

23 The feedback loop provides more than the evolutionary overdrive  
24 that one might expect from my earlier analogy to catalysts. It better  
25 resembles a free ride up an escalator, where a habitat preference for  
26 its intake position enables this exception to the familiar process of  
27 shaping an adaptation by selective survival. Trait hitchhiking joins  
28 such free ride examples as Darwin's conversion of function (11) and  
29 the head start provided by an existing adaptation, from which an  
30 elaborate secondary use may develop that itself has no history of  
31 natural selection (12).

1 I thank my University of Washington colleagues James J. Anderson, Katherine  
2 Graubard, and Charles D. Laird for discussions on the manuscript.

3

## 4 References

- 5 1. Calvin WH. *The Ascent of Mind*. New York: Bantam; 1989, p.89
- 6 2. Cerling TE, Andanje SA, Blumenthal SA, Brown FH, Chritz KL, Harris  
7 JM, et al. Dietary changes of large herbivores in the Turkana Basin,  
8 Kenya from 4 to 1 Ma. *Proc Natl Acad Sci U S A*. 2015; 112: 11467-11472.  
9 doi: 10.1073/pnas.1513075112
- 10 3. Edelaar P, Bolnick DI. Non-random gene flow: an underappreciated  
11 force in evolution and ecology. *Trends Ecol Evol*. 2012; 27: 659-665.  
12 doi: 10.1016/j.tree.2012.07.009
- 13 4. Wright S. The genetical theory of natural selection. *J Hered*. 1930; 21:  
14 349-356. Link: [jhered.oxfordjournals.org/content/21/8/349.extract#](http://jhered.oxfordjournals.org/content/21/8/349.extract#)
- 15 5. Calvin WH. *The Cerebral Code*. Cambridge MA: MIT Press; 1996
- 16 6. Calvin WH, Bickerton D. *Lingua ex Machina*. Cambridge MA: MIT  
17 Press; 2000, p.83
- 18 7. Calvin WH. *A Brief History of the Mind*. New York: Oxford University  
19 Press; 2004
- 20 8. Swan SH, Waller K, Hopkins B, Windham G, Fenster L, Schaefer C,  
21 Neutra RR. A prospective study of spontaneous abortion: relation to  
22 amount and source of drinking water consumed in early pregnancy.  
23 *Epidemiology* 1998; 9: 126-133
- 24 9. Calvin WH. A brush fire feedback loop for the ramp-like rise in hominin  
25 brain size that began 2.4 million years ago. Preprint. Available: bioRxiv  
26 2016; doi: <http://dx.doi.org/10.1101/xxxx>
- 27 10. Nowak MA, Tarnita CE, Wilson EO. The evolution of eusociality.  
28 *Nature* 2010; 466: 1057-1062. doi: 10.1038/nature09205
- 29 11. Caianiello S. Succession of function, from Darwin to Dohrn. *Hist*  
30 *Philos Life Sci*. 2015; 36: 335-345. doi: 10.1007/s40656-014-0041-y
- 31 12. Calvin WH. *A Brain for All Seasons: Human Evolution and Abrupt*  
32 *Climate Change*. London and Chicago: University of Chicago Press; 2002
